1 Sophisticated Prediction of Carotid-Plaque Vulnerability by Nanocluster Sensitized  
2 High-resolution Vessel-Wall-Imaging Profile in Rabbit Atherosclerotic Model

3 Running title: A successful translation provide reasonable diagnostic readouts from animals

4

5 Authors

6 *Yan Gong<sup>1</sup>, Menglin Wu<sup>2</sup>, Dingwei Fu<sup>3</sup>, Yu Guo<sup>1</sup>, Xiudi Lu<sup>4</sup>, Ying Zou<sup>4</sup>, Xiang Zhang<sup>5</sup>, Jinxia  
7 Zhu<sup>6</sup>, Xianchang Zhang<sup>6</sup>, Xue Li<sup>2\*</sup>, Shuang Xia<sup>1\*</sup>*

8 Author affiliations

9 *<sup>1</sup>Department of Radiology, Medical Imaging Institute of Tianjin, Tianjin First Central  
10 Hospital, School of Medicine, Nankai University, Tianjin, 300192, China*

11 *<sup>2</sup>Department of Radiology, Second Hospital of Tianjin Medical University, Tianjin 300211,  
12 China*

13 *<sup>3</sup>Department of Radiology, First Central Clinical College, Tianjin Medical University, Tianjin  
14 300192, China*

15 *<sup>4</sup>Department of Radiology, First Teaching Hospital of Tianjin University of Traditional  
16 Chinese Medicine, Tianjin, China National Clinical Research Center for Chinese Medicine  
17 Acupuncture and Moxibustion, Tianjin, China*

18 *<sup>5</sup>Department of Radiology, Tianjin Nankai Hospital, Tianjin 300100, China*

19 *<sup>6</sup>MR Collaboration, Siemens Healthcare Ltd., Beijing 100102, China*

20 Correspondence`

21 *Shuang Xia, Department of Radiology, Medical Imaging Institute of Tianjin, Tianjin First  
22 Central Hospital, School of Medicine, Nankai University, Tianjin, 300192, China*

23 *Email: 5020200851@nankai.edu.cn*

24 *Xue Li, Department of Radiology, Second Hospital of Tianjin Medical University, Tianjin  
25 300211, China*

26 *Email addresses: [lixue1229@tmu.edu.cn](mailto:lixue1229@tmu.edu.cn)*

27 Statement of equal author contribution

28 *Yan Gong, Menglin Wu and Dingwei Fu contributed equally to this study*

29 *Shuang Xia and Xue Li are co-correspondences*

30 Manuscript Type: Original Research

31 Sophisticated Prediction of Carotid-Plaque Vulnerability by Nanocluster Sensitized  
32 High-resolution Vessel-Wall-Imaging Profile in Rabbit Atherosclerotic Model

33 Running title: A successful translation provide reasonable diagnostic readouts from animals

34

35 Abstract

36 OBJECTIVE: To innovatively developed a macrophage-target nanoparticle based  
37 contrast-enhanced high-resolution magnetic resonance vessel wall imaging (HR-VWI)  
38 strategy to characterize the plaques' vulnerable features on rabbits.

39

40 BACKGROUND: Lacking of sensitive and specific image-marker of HR-VWI leads this  
41 technique depending upon the plaque morphological characteristics. Nanoparticle-based  
42 contrast agents modified with targeting ligands allow amplifying MR signals of the interested  
43 components. The key to successful translation is the requirement that conducting studies in  
44 larger animals to provide reasonable diagnostic readouts.

45

46 METHODS: The HR-VWI enhanced with macrophage-targeted PP1-Au@GSH@Gd (GdMG)  
47 nanoclusters (NCs) and the conventional Gadovist were utilized for the plaque vulnerability  
48 evaluation by a systematic histogram analysis in atherosclerosis (AS) rabbit model.

49

50 RESULTS: Due to the compelling targeting capacity of GdMG NCs to foamy macrophages,  
51 the contrast-to-noise ratio (CNR) from pre-injection baseline dramatically raised from 6.50 to  
52 36.91 ( $p < 0.001$ ), with an increment of 1.39-fold higher than that of the Gadovist approach.  
53 Spearman's correlation test confirmed that the coefficient of variation (CV) derived from the  
54 histogram analysis based on GdMG NCs HR-VWI was indeed positively linearly correlated  
55 with pathology vulnerability index ( $VI_p$ ) significantly ( $p < 0.05$ ) with adjusted  $R^2 = 0.775$ .  
56 Finally, mathematic formulas with histogram-derived parameters as variables were fitted to  
57 quantitatively calculate the histogram vulnerability index ( $VI_H$ ) with the strength of the  
58 adjusted  $R^2 = 0.952$  ( $p < 0.001$ ), and Area under the curve (AUC) of 0.875 ( $p < 0.001$ ) to  
59 realize the *in vivo* and quantitative calculation of the plaque vulnerability.

60

61 CONCLUSION: Profiting from the splendid inflammation targeted capacity and excellent  
62 MRI performance of GdMG NCs, as well as the highly quantitative characteristics of  
63 histogram analysis, we disclosed that our established imaging protocol was able to identify  
64 the plaques' vulnerability index that were comparable to pathological examinations in both  
65 retrospective and prospective experiments.

66

67 Key Words

68 Atherosclerosis; plaque; high-resolution magnetic resonance vessel wall imaging; histogram;  
69 macrophage-target nanoparticle.

70

71 Abbreviations List

72 Atherosclerosis = AS

73 GdMG NCs = Gd-modified macrophage-target gold nanoclusters

74 HR-VWI = high-resolution vessel wall imaging

75 PPI = a novel 16-mer peptide targeted scavenger receptor AI

76 SR-A = scavenger receptors A

77 TOF-MRA = time-of-flight magnetic resonance angiography

78 CV = coefficient of variation

79

## 80 **1. INTRODUCTION**

81 Ischemic stroke that attributed to thromboembolism caused by carotid atherosclerotic  
82 plaque has represented a massive public health issue<sup>1-3</sup>, with an estimated 6.5% increase in  
83 mortality from 2015 to 2019<sup>4</sup>. These sudden ischemic strokes usually contribute to  
84 unheralded rupture of high-risk atherosclerotic plaques. In this context, identification of  
85 plaque features which pose a high risk of rupture in a noninvasive manner is of paramount  
86 important for preventing acute vascular events. Among all the current imaging techniques,  
87 contrast-enhanced high-resolution magnetic resonance vessel wall imaging (HR-VWI) has  
88 been recognized as a promising imaging technique to track the arterial atherosclerosis by  
89 depicting the plaque presence, size and morphology with submillimetre resolution. A useful  
90 work in this term by our group has demonstrated that contrast-enhanced HR-VWI is a  
91 compatible standard to digital subtraction angiography (DSA) on analyzing plaque  
92 morphology stenosis, benefiting from its efficient suppression on surrounding fluid signals  
93 and high temporospatial resolution<sup>5</sup>. Despite well appreciated advantages, the inherent  
94 limitations of HR-VWI, especially lack of sensitive and specific MRI contrast agents, lead  
95 this imaging technique being largely dependent on the morphological characteristics of the  
96 plaques when stratifying atherosclerotic risk, severely hampering its application in preventing  
97 acute vascular events. In some cases, the risk plaques appear completely normal without any  
98 prior symptoms, and the changes of indicative biomarkers such as intraplaque hemorrhage  
99 (IPH), lipid-rich necrotic core (LRNC), thin fiber cap are prerequisite required for  
100 confirmation of the plaques' diagnosis<sup>6-8</sup>.

101 Tremendous efforts have been devoted to the development of MRI contrast agents to  
102 diagnose atherosclerosis beyond morphological characteristics or physiological function

103 changes. Particularly, nanoparticle-based contrast agents with high surface-to-volume ratios  
104 allow the surface layers to be modified with targeting ligands (e.g., antibodies, proteins,  
105 peptides), for targeted local amplifying MR signals of the interested components<sup>9-11</sup>. For  
106 example, more recently, our groups reported the peptide functionalized nanoparticles that can  
107 specifically target inflammatory macrophages in plaques for quantitatively characterizing the  
108 activity of foamy burden at the molecular level in ApoE<sup>-/-</sup> mice<sup>12</sup>, providing a chance for the  
109 utilization of nanoparticle-based contrast agents to predict the carotid plaque vulnerability<sup>13</sup>.  
110 Although the MR signals generated by the nanoparticle-based contrast agents are associated  
111 with the vulnerability of plaques, it still remains daunting gap between the pre-clinical  
112 researches and large-scale clinical applications. One of those challenges is that overwhelming  
113 majority of pre-clinical works is merely limited to proof-of-concept mouse studies. However,  
114 the key to successful translation is the need to conduct studies in larger animals to provide  
115 reasonable diagnostic readouts that differ from mouse studies. Another challenge is the  
116 interpretation of the MR signal patterns still highly relies on the radiologists' expertise and  
117 experience, which may reduce the reproducibility or consistency of diagnostic results, and  
118 thereby impairing the long-term monitoring of atherosclerosis progression. Concurrently, a  
119 paradigm shift in this field has gained momentum as new imaging strategies to provide useful  
120 experience for the clinically translation.

121 To address this need, we report a nanoparticle (Gd-modified macrophage-target gold  
122 nanoclusters, GdMG NCs) based imaging strategy that surmounts the aforementioned hurdles  
123 to precisely predict the carotid plaque vulnerability on the medium-sized animal model (a  
124 rabbit atherosclerotic model). Capitalizing on established work<sup>12</sup>, we firstly confirmed the  
125 HR-VWI performance of GdMG NCs *in vitro* and *in vivo*. Next, we innovatively developed a  
126 systematic histogram-based imaging protocol to characterize the plaques' vulnerable features  
127 through establishing the relationships between the sensitized HR-VWI histogram profile and  
128 the histological vulnerability index. As anticipated, the *in vivo* performance of GdMG NCs  
129 suggested that GdMG NCs could promote HR-VWI recognition of AS plaques, evaluating  
130 plaque progression and simultaneously identifying the plaques' vulnerability index in a

131 noninvasive manner. Profiting from the splendid inflammation targeted capacity and  
132 excellent MRI performance of GdMG NCs, as well as the highly quantitative characteristics  
133 of histogram analysis, we disclosed that our established imaging protocol was able to identify  
134 the plaques' vulnerability index that were comparable to pathological examinations in both  
135 retrospective and prospective experiments.

## 136 **2. METHODS**

### 137 **2.1 SYNTHESIS OF GDMG NCS**

138 The synthesis of the PP1-Au@GSH@Gd NCs (GdMG NCs) followed a typical pattern. The  
139 synthesis of GdMG NCs and *in vitro* parallel imaging experiment is analytically described in  
140 Supplemental Material (*Synthesis of PP1-Au@GSH@Gd NCs*).

141

### 142 **2.2 ANIMAL MODEL OF ATHEROSCLEROTIC PLAQUE**

143 The plaque formation was induced by balloon injury on the rabbits left common carotid  
144 artery (LCCA) and followed with continuously high-fat diet (HFD). The atherogenic rabbits  
145 were intramuscularly anesthetized with ketamine (35 mg/kg), acepromazine (0.75 mg/kg),  
146 and xylazine (5 mg/kg). During the procedure, anesthesia was maintained with isoflurane  
147 inhalation. Rabbits were euthanized with an overdose of sodium pentobarbital (160 mg/kg  
148 i.p.). The feeding protocol and surgery procedure was adequately described in Supplemental  
149 Material (*Animal model of atherosclerotic plaque*).

150

### 151 **2.3 IN VIVO HR-VWI AND ANALYSIS**

152 The quantitative imaging measurements on the source images and the reconstructed images  
153 for the vessel wall area (WA) (**Figure 2G**), and plaque area (PA) (**Figure 2G**) are given. The  
154 contrast-to-noise ratios (CNR) and the contrast index (CI) were measured to reflect the  
155 enhancement ability and nanoclusters deposition in the plaque region. The quantitative  
156 histogram analysis of HR-VWI data was performed by segmenting the plaque and using the  
157 freehand selection tool in the ImageJ software on HR-VWI (**Figure 4A**).<sup>14</sup> The detailed  
158 HR-VWI examination criteria, applied sequence protocol and analysis criteria are described  
159 in the Supplemental Material (*In vivo HR-VWI and analysis, Standard workflow of image*  
160 *interpretation* and **S. Table 1**).

161

## 162 **2.5 EX VIVO ANALYSES**

163 The histology staining for plaque tissue and the analysis criteria of pathology vulnerability  
164 index (VI<sub>p</sub>) for differentiating vulnerable plaques was meticulously described in the  
165 Supplemental Material (*Ex vivo analyses*).

166 The characterization and stability study of GdMG NCs in combination with *in vivo*  
167 security evaluation was also described in Supplemental Material (*Characterization of*  
168 *PDA/Gd/Cu* and **S. Figure 1**), as has been reported in the previous works in the literature.<sup>15-17</sup>

169

## 170 **3. STATISTICAL ANALYSIS**

171 The continuous variables were reported as appropriate. The normality was assessed formally  
172 by using the Shapiro-Wilk test. The advanced statistical methods were described in  
173 Supplemental Material (*Statistical Analysis*).

174

## 175 **4. RESULTS**

### 176 **4.1 CONSTRUCTION OF THE ATHEROSCLEROTIC RABBIT MODEL**

177 The successful construction of the atherosclerotic rabbit model can be observed from **Figure**  
178 **1** and were described in Supplemental Material (*Supplemental Results*).

179

### 180 **4.2 INVESTIGATION OF THE HR-VWI PERFORMANCE OF GDMG NCS**

181 In this work, for targeting the imaging foamy macrophage in plaque, the PP1-Au@GSH@Gd  
182 NCs (GdMG NCs) was constructed by in situ reducing the Au atom into the zwitterionic  
183 glutathione (GSH) shell with both Gd-DTPAA and PP1 peptide modification, which yielded  
184 uniform size and a superior degree of dispersion. The characteristics of the prepared GdMG  
185 NCs were described in (supplemental **S. Figure 1**). Then, the imaging property of GdMG  
186 NCs on HR-VWI was investigated *in vitro* and *in vivo* (supplemental **S. Figure. 2**). From  
187 these results, strong shreds of evidence were provided to verify the GdMG NCs could serve  
188 as an ideal contrast agent for HR-VWI.

189 Encouraged by the superb performance of *in vitro* HR-VWI contrast capacity, the *in vivo*

190 foamy macrophage targeting and the selectivity efficacy of GdMG NCs on HR-VWI in  
191 atherosclerotic rabbit models were next comprehensively quantified in comparison with  
192 Gadovist (**Figure 2**). The results proved that GdMG NCs providing more definite  
193 morphologic indices to identify the manifestation of culprit plaque-induced stenosis in  
194 LCCAs compared with the Gadovist approach (detailed in *Supplemental Results, S. Figure 3*  
195 **and S. Figure 4**). Consequently, from the Oil Red O, IHC staining, and silver-staining of the  
196 LCCAs, significant lipid deposits and abundant foamy macrophages enrichment were  
197 verified in the HR-VWI-highlighted regions induced by the GdMG NCs aggregation,  
198 providing strong pieces of evidence for the compelling targeting capacity of GdMG NCs to  
199 foamy macrophages in atherosclerotic plaques.

200

### 201 **4.3 THE REPRODUCIBILITY AND RELIABILITY OF PLAQUE EVALUATION BY** 202 **GDMG NCS ENHANCED HR-VWI**

203 Herein, the dynamic changes of the wall area (WA) and plaque area (PA) were also used to  
204 quantify the collected imaging patterns (**Figure 3A**). For the progression of WA (**Figure 3C**)  
205 and PA (**Figure 3D**) determined by the two different contrast agents, repeated measures  
206 analysis of variance (RM ANOVA) was performed. By referring to the gold standard in the  
207 histology of the H&E staining (supplemental **S. Figure 7**), the curve of GdMG NCs was  
208 more steeply centered to the base axis ( $x = 0$ ), indicating better accordance with the  
209 histological analysis compared to Gadovist ( $p < 0.05$ ) approach for the assessment of WA  
210 (**Figure 3F**) and PA (**Figure 3G**) (supplemental material S. Table 3).<sup>18</sup> The detailed results



211 Intra-observer, and inter-observer reproducibility of both GdMG NCs and Gadovist in the  
212 quantification of WA and PA were described in Supplemental Material (*Supplemental*  
213 *Results*).

214

#### 215 **4.4 IN VIVO EFFECTS OF GDMG NCS ON PLAQUE VULNERABILITY** 216 **PREDICTION**

217 After revealing the superior competence of GdMG NCs in measuring the morphological  
218 assessment for plaque, plaque vulnerability prediction studies were further conducted based  
219 on the contrast-enhanced HR-VWI. **Figure 4** presents a graphical flowchart of the designed  
220 method for the quantitative characterization of plaque vulnerability by histogram analysis  
221 based on GdGM NCs enhanced HR-VWI *in vivo*. The pathology vulnerability index ( $VI_P$ ),  
222 which can be defined as the ratio of the destabilizing components (macrophage plus lipid) to  
223 the stabilizing components (smooth muscle cell plus collagen), was used as the gold standard  
224 for quantifying plaque vulnerability, with stable ( $VI_P < 1.024$ ) and vulnerable ( $VI_P \geq 1.024$ )  
225 groups<sup>19</sup>.  $VI_P$  emphasized the destabilized role of macrophage in plaque vulnerability, which  
226 additionally reflected the plaque heterogeneity comprehensively. According to these  
227 comprehensive criteria, histological-defined plaques were divided into vulnerable and stable  
228 groups to retrospectively analyze their histogram characteristics on GdMG NCs enhanced  
229 HR-VWI. As is illustrated in **Figure 5A**, the shapes of the histogram by GdMG NCs  
230 dramatically varied in different plaque types. To quantify the histogram features in the  
231 different plaque types, the kurtosis, skewness, and CV were utilized to clarify the correlation

232 between the signal intensity distribution and  $VI_P$ . The histological classification for plaque  
233 vulnerability that corresponds to the image-colocalization in **Figure 5B** may provide clues to  
234 the histogram features presented by vulnerable plaques. As can be observed from **Figure 5C**,  
235 CV derived from GdMG NCs of vulnerable plaque was significantly higher than that of the  
236 stable plaque ( $p = 0.003$ ), indicating the existence of a more dispersed signal distribution  
237 representing the heterogeneous enhancement (supplemental **S. Table 2**), which can be  
238 explained by the above-mentioned enhancement mechanism related to the uneven distribution  
239 of macrophages. Furthermore, from the Spearman's correlation test, it was confirmed that the  
240 CV was indeed positively linearly correlated with  $VI_P$  significantly ( $p < 0.05$ ) with adjusted  
241  $R^2 = 0.775$  (**Figure 5D**, supplemental **S. Table 7**), implying a positive correlation between  
242 CV and macrophage content as well. Comparatively, other indicators (kurtosis and skewness)  
243 turned out to have no significant difference for dichotomous outcomes (stable vs vulnerable)  
244 derived from GdMG NCs (supplemental **S. Figure 9**). Nonetheless, none of the histogram  
245 parameters derived from the Gadovist method showed distinctions between stable and  
246 vulnerable plaques ( $p > 0.05$ ). Simultaneously, by considering the  $VI_P$  was time-dependent  
247 (**Figure 5E**) ( $p < 0.05$ ), both the GdMG NCs derived histogram parameters and  
248 HFD-inducing period (Week) were introduced into the multiple linear regression analysis to  
249 establish the non-invasive histogram vulnerability index ( $VI_H$ ) for reasonable prediction.  
250 Meanwhile, from the histological classification results with  $VI_P$  for the overall assessment of  
251 plaque composition, an increasing proportion of vulnerable plaques during long-term HFD  
252 intervention was demonstrated (supplemental **S. Figure 10**). Finally, two formulas were fitted

253 as follow: (model 1)  $VI_H = 0.366 + 0.012\text{Week} + 1.361\text{CV}$ , and (model 2)  $VI_H = 0.226 +$   
254  $0.005\text{Week} + 2.459\text{CV} - 0.019\text{kurtosis}$ . In model 1, CV and Week contributed as variables to  
255 calculate  $VI_H$  with adjusted  $R^2 = 0.897$  ( $p < 0.001$ ). Notably, the strength of model 2 was  
256 stronger elevated with CV, kurtosis, and Week as the variables with different coefficients for  
257  $VI_H$  with adjusted  $R^2 = 0.952$  ( $p < 0.001$ ) (supplemental **S. Table 8**). Based on the  
258 above-mentioned results, *in vivo* and quantitative calculation for plaque vulnerability was  
259 realized by using histogram-defined parameters (histogram vulnerability index,  $VI_H$ ) derived  
260 from GdMG NCs enhanced HR-VWI.

261 Consequently, the diagnostic accuracy and prediction performance of  $VI_H$ , which was  
262 calculated from the fitting formulas (models 1 and 2), was further prospectively investigated  
263 in distinguishing vulnerable plaque *in vivo* with histology validation. For this reason, twelve  
264 atherosclerosis rabbits were randomly chosen covering the whole HFD-inducing session and  
265 were imaged by GdMG NCs enhanced HR-VWI for the  $VI_H$  evaluation. The  
266 histogram-derived parameters based on GdMG NCs enhanced HR-VWI were next introduced  
267 to the fitting formulas of the  $VI_H$  prediction. Then, the efficiency of the prediction results was  
268 confirmed by the histological proof ( $VI_P$ ) with a total number of 8 vulnerable plaques and 4  
269 stable plaques. Supplemental S. Table 9 depicts the sum of 3 (3/8) lesions with  $VI_H \geq 1.024$   
270 that were precisely assigned to vulnerable plaques by using formula model 1, whereas model  
271 2 detected 6 (6/8) vulnerable ones. On the contrary, 5 (5/8) vulnerable plaques were  
272 misestimated as stable lesions by using the formula model 1, and only 2 (2/8) were  
273 misestimated by model 2. Meanwhile, 4 stable plaques were all accurately recognized by

274 both formulas. The above-mentioned results indicated that formula model 2 had a higher  
275 discriminative power in identifying the high-risk vulnerable plaques. The ROC analysis  
276 (**Figure 5G**) was also conducted to examine the diagnostic performance of the two models in  
277 determining the vulnerability of each lesion against the reference standard ( $VI_P$ ). What's more,  
278 Model 2-defined improved the diagnostic accuracy with an AUC value of 0.875 ( $p < 0.001$ ),  
279 which was 1.27-fold higher than model 1 (AUC = 0.688,  $p = 0.040$ ). Additionally, as an  
280 image-mediated diagnostic protocol, both sensitivity and specificity for potential risk  
281 prediction should be aimed to improve. The table in **Figure 5G** illustrated the significantly  
282 elevated diagnostic sensitivity of model 2 with respect to model 1 (75.0% vs 37.5%),  
283 maintaining the perfect diagnostic specificity (100% vs 100%) as well.

284

#### 285 **4.5 DIAGNOSIS AND PREDICTION OF VULNERABLE PLAQUE VIA** 286 **NANO-ENHANCED IMAGING VULNERABILITY INDEX**

287 The representative cases are shown in **Figure 6**. The  $VI_H$  results of case 1 (**Figure 6A**) by  
288 model 2 deemed it a vulnerable lesion ( $VI_H = 1.294$ ). From the histological analysis (**Figure**  
289 **6B**), a vulnerable plaque ( $VI_P = 1.165$ ) was confirmed, which was in accordance with model  
290 2. Case 2 (**Figure 6C**) revealed also the stable lesion consistently diagnosed by model 2 ( $VI_H$   
291 = 0.992), which was further acknowledged by histology ( $VI_P = 0.847$ ) (**Figure 6D**). From the  
292 above-mentioned results, it was demonstrated that the utilizing value is a superb predictive  
293 tool for determining plaque vulnerability by using the formula model 2 extracted from GdMG  
294 NCs enhanced HR-VWI, both non-invasively and quantitatively. The histogram-defined

295 signal dispersion, CV, is a strong predictor for the differentiation of the lesion type for both  
296 MCA and BA. Compared with CV, the combination of other parameters including kurtosis,  
297 and time did improve the diagnostic power significantly.

298

#### 299 **4.6 BIOCOMPATIBILITY OF GDMG NCS**

300 The Biocompatibility of GdMG NCs in Supplemental Material (*Biocompatibility of GdMG*  
301 *NCs and S. Figure 11*) proved that it had no remarkable side impact on tissues, further  
302 confirming its prominent biocompatibility, which might carve out the way for its promising  
303 future biomedical applications.

304

#### 305 **5. DISCUSSION**

306 A remarkable gain for the accurate assessment of plaque vulnerability was demonstrated by  
307 this innovatively designed work through macrophage-targeted enhanced HR-VWI-based  
308 histogram analysis. The diagnostic and predictive value of the proposed method in  
309 quantitatively distinguishing vulnerable plaques in perfect accordance with the respective  
310 histology criteria (pathology vulnerability index) was highlighted. Furthermore, the  
311 combination of HR-VWI, macrophage-targeted contrast agent, and histogram analysis can  
312 offer a direct mechanistic link to improve the diagnostic reliability objectively, thereby  
313 facilitating the clinical translation.

314 The advantages of HR-VWI and the necessity of the macrophage-targeting contrast agents  
315 were discussed in Supplemental Material (*Supplemental discussion*)

316 It is a critical-but-challenging task for the current image-evaluation method to provide  
317 objective and biologic-accordance information that helps in both clinical diagnosis and  
318 management. Growing pieces of evidence have demonstrated the morphological, pathological,  
319 and functional properties of the various tissue types that are associated with a high likelihood  
320 of plaque rapid progression and rupture<sup>20</sup>. More specifically, a large LRNC infiltrated by  
321 macrophages was prone to rupture, while, on the contrary, collagen, and plaque smooth  
322 muscle cell help stabilize the plaque structure. In general, the pathology vulnerability index  
323 ( $VI_p$ ) is considered an important index to screen vulnerable plaques the higher  $VI_p$  represents  
324 more unstable plaques, whereas a  $VI_p$  larger than 1.024 was proved to be vulnerable.  
325 “Vulnerable plaque” can be viewed as a function of its composition than size. Meanwhile, the  
326 vulnerable plaque relies on image interpretation was diagnosed in previous studies, which  
327 may overlook or overestimate some morphological information (lumen stenosis, plaque  
328 enhancement, and IPH) due to personal diagnostic experience and understanding of the MR  
329 physics in radiology.<sup>6,21</sup> Hence, to better access the plaque vulnerability, it is vital to  
330 emphasize the tissue-specific image properties of the plaque heterogeneity by image  
331 interpretation. Inspired by SHI Z. etc., who reported that histogram analysis based on  
332 conventional  $T_1WI$  image can contribute to differentiating the intracranial plaque type, we  
333 expanded their conclusion and finally reached an exciting advance in quantified plaque  
334 vulnerability with a statistical method. From the provided statistical analysis, it can be argued

335 that CV has a positive correlation to plaque type, which was also consistent with the  
336 literature.<sup>22</sup> The underlying reason for vulnerable plaque to exhibit such high CV may be due  
337 to the various components in advanced lesions, i.e. necrosis increased due to the impaired  
338 ability of macrophages to efferocytose apoptotic cells, and macrophages in advanced lesions  
339 also secrete matrix metalloproteinases contributing to fibrous cap thinning and plaque  
340 rupture.<sup>23,24</sup> In addition, GdMG NCs can also generate HR-VWI signal increment when  
341 internalized by macrophages. Thus, the ratio of the foamy macrophage in plaque can impact  
342 the kurtosis (reflecting the most range of signal intensity)<sup>25,26</sup>. Skewness also reflects the  
343 uneven plaque component distribution by the existence of an asymmetrical shape. For  
344 example, the distribution of vascular smooth muscle cell (VSMC) and micro-calcification,  
345 both of which may increase the plaque rupture risk.<sup>27</sup> Furthermore, the histogram diagram  
346 can fully reflect the plaque heterogeneity since the different components have  
347 distinguishing signal patterns due to their inherent relaxation rate within the ROI. To the best  
348 of our knowledge, our designed experiment is the pioneering workflow to quantitate the  
349 plaque vulnerability via histogram based on the macrophage-targeted plaque HR-VWI *in vivo*,  
350 which had a satisfactory diagnostic performance with both optimized specificity and  
351 sensitivity. Moreover, the proposed analysis processing is generated in Radiant and ImageJ  
352 software packages, both of which are in general use and easily available, hence making the  
353 introduced method applicable and adjustable for other studies in plaque vulnerability and  
354 clinical applications for risk management.

355 Although the high sensitivity of the HR-VWI-based molecular image method permits the

356 detection of subtle morphological and physiological changes of AS plaque with small sample  
357 sizes, this animal experiment still suffers from several limitations including essential  
358 differences in disease progression from humans, lack of external validation for clinical  
359 management, and long duration to assess disease progression.<sup>28-30</sup> Here, the concept of  
360 triangulation by image-evaluating, histology validation, and statistical analysis were applied  
361 to increase confidence that an objective exact method was correctly conducted.

## 362 **6. CONCLUSIONS**

363 The proposed integrative analysis provided an overall picture of the non-invasive nano-image  
364 method for quantifying plaque vulnerability and substantially increasing the relevance of the  
365 results for clinical reference. The use of GdMG NCs as macrophage-targeted HR-VWI is  
366 considered a promising diagnosis avenue for many inflammation-related diseases.  
367 Additionally, a deep understanding between the quantified histogram parameters and plaque  
368 vulnerability will potentially improve our ability to harness the mechanism for developing  
369 novel image strategies against cardiovascular disease and promote the prediction before  
370 adverse clinical events. Although this is a proof-of-concept that was only tested in rabbits, it  
371 lays a strong foundation for the bench-to-bedside translation of nano-agent-enhanced  
372 HR-VWI for stroke risk prediction and prevention.

## 373 **SOURCES OF FUNDING**

374 This work was funded by the Natural Science Foundation of China (82171916, 81871342),  
375 the Natural Scientific Foundation of Tianjin (21CYBJC01580), Tianjin Health Science and



376 technology project (Specific projects of key disciplines) (TJWJ2022XK019), Tianjin Key

377 Medical Discipline (Specialty) Construction Project (TJYXZDXK-041A).

378

379 **DISCLOSURE PARAGRAPH**

380 **1. *Guarantor:***

381 The scientific guarantor of this publication is Shuang Xia.

382 **2. *Conflict of Interest:***

383 The authors of this manuscript declare that they have no relationships with any

384 companies whose products or services may be related to the subject matter of the

385 article.

386 **3. *Statistics and Biometry:***

387 No complex statistical methods were necessary for this paper.

388 **4. *Informed Consent:***

389 Written informed consent was waived by the Institutional Review Board.

390 **5. *Ethical Approval:***

391 This animal study was approved by the Institutional Animal Care and Use Committee

392 of Nankai University (No. 2021-SYDWLL-000425). The study was consistent with

393 regulations for the Administration of Affairs Concerning Experimental Animals of

394 China. There are no ethical/legal conflicts involved in the article.

395 **6. *Study subjects or cohorts overlap:***

396 No study subjects or cohorts have been previously reported.

## 397 **7. Methodology**

398 • diagnostic or prognostic study

399 • animal experiment

400

### 401 **KEY POINTS**

402 **QUESTION:** The effectiveness of the Gd-modified macrophage-target gold  
403 nanoclusters-based imaging strategy in predicting carotid plaque vulnerability on a  
404 medium-sized animal model?

405 **PERTINENT FINDINGS:**

406 **IMPLICATIONS FOR PATIENT CARE:** The development of a nanoparticle-based imaging  
407 strategy that can precisely predict carotid plaque vulnerability in a noninvasive manner could  
408 potentially improve patient care by allowing for earlier identification and treatment of  
409 high-risk plaques, thereby preventing acute vascular events.

410

### 411 **REFERENCES**

- 412 **1.** Rune I, Rolin B, Lykkesfeldt J. Long-term Western diet fed apolipoprotein E-deficient rats  
413 exhibit only modest early atherosclerotic characteristics. *Sci Rep* 2018;8:5416.
- 414 **2.** Saba L, Moody AR, Saam T. Vessel Wall-Imaging Biomarkers of Carotid Plaque  
415 Vulnerability in Stroke Prevention Trials: A viewpoint from The Carotid Imaging Consensus  
416 Group. *JACC Cardiovasc Imaging* 2020;13:2445-2456.
- 417 **3.** Hoshino T, Sissani L, Labreuche J. Prevalence of Systemic Atherosclerosis Burdens and  
418 Overlapping Stroke Etiologies and Their Associations With Long-term Vascular Prognosis in  
419 Stroke With Intracranial Atherosclerotic Disease. *JAMA Neurol* 2018;75:203-211.
- 420 **4.** Goddi A, Bortolotto C, Fiorina I. High-frame rate vector flow imaging of the carotid

- 421 bifurcation. *Insights Imaging* 2017;8:319-328.
- 422 **5.** Mandell DM, Mossa-Basha M, Qiao Y. Intracranial Vessel Wall MRI: Principles and  
423 Expert Consensus Recommendations of the American Society of Neuroradiology. *AJNR Am*  
424 *J Neuroradiol* 2017;38:218-229.
- 425 **6.** Saba L, Saam T, Jäger HR. Imaging biomarkers of vulnerable carotid plaques for stroke  
426 risk prediction and their potential clinical implications. *The Lancet Neurology*  
427 2019;18:559-572.
- 428 **7.** Zhao X, Hippe DS, Li R. Prevalence and Characteristics of Carotid Artery High-Risk  
429 Atherosclerotic Plaques in Chinese Patients With Cerebrovascular Symptoms: A Chinese  
430 Atherosclerosis Risk Evaluation II Study. *J Am Heart Assoc* 2017;6.
- 431 **8.** Kamtchum-Tatuene J, Noubiap JJ, Wilman AH. Prevalence of High-risk Plaques and Risk  
432 of Stroke in Patients With Asymptomatic Carotid Stenosis: A Meta-analysis. *JAMA Neurol*  
433 2020;77:1524-1535.
- 434 **9.** Amirbekian V, Lipinski M, Briley-Saebo K. Detecting and assessing macrophages in vivo  
435 to evaluate atherosclerosis noninvasively using molecular MRI. *Proc Natl Acad Sci U S A*  
436 2007;104:961-966.
- 437 **10.** Li X, Wu M, Li J. Advanced targeted nanomedicines for vulnerable atherosclerosis plaque  
438 imaging and their potential clinical implications. *Front Pharmacol* 2022;13:906512.
- 439 **11.** Xue, Li, Menglin. Ultrasmall bimodal nanomolecules enhanced tumor angiogenesis  
440 contrast with endothelial cell targeting and molecular pharmacokinetics. *Nanomedicine*  
441 *Nanotechnology Biology & Medicine* 2019.
- 442 **12.** Wang J, Wu M, Chang J. Scavenger receptor-AI-targeted ultrasmall gold nanoclusters  
443 facilitate in vivo MR and ex vivo fluorescence dual-modality visualization of vulnerable  
444 atherosclerotic plaques. *Nanomedicine* 2019;19:81-94.
- 445 **13.** Wu M, Li X, Guo Q. Magnetic mesoporous silica nanoparticles-aided dual MR/NIRF  
446 imaging to identify macrophage enrichment in atherosclerotic plaques. *Nanomedicine*  
447 2020;32:102330.
- 448 **14.** Obaid DR, Calvert PA, Gopalan D. Atherosclerotic plaque composition and classification  
449 identified by coronary computed tomography: assessment of computed  
450 tomography-generated plaque maps compared with virtual histology intravascular ultrasound  
451 and histology. *Circ Cardiovasc Imaging* 2013;6:655-664.
- 452 **15.** Visscher M, Moerman AM, Burgers PC. Data Processing Pipeline for Lipid Profiling of  
453 Carotid Atherosclerotic Plaque with Mass Spectrometry Imaging. *J Am Soc Mass Spectrom*  
454 2019;30:1790-1800.
- 455 **16.** Senders ML, Hernot S, Carlucci G. Nanobody-Facilitated Multiparametric PET/MRI  
456 Phenotyping of Atherosclerosis. *JACC Cardiovasc Imaging* 2019;12:2015-2026.
- 457 **17.** Zhang Z, Jiang Y, Zhou Z. Scavenger receptor A1 attenuates aortic dissection via  
458 promoting efferocytosis in macrophages. *Biochem Pharmacol* 2019;168:392-403.
- 459 **18.** Gong Y, Cao C, Guo Y. Quantification of intracranial arterial stenotic degree evaluated by  
460 high-resolution vessel wall imaging and time-of-flight MR angiography: reproducibility, and  
461 diagnostic agreement with DSA. *Eur Radiol* 2021.
- 462 **19.** Cao Y, Xiao X, Liu Z. Detecting vulnerable plaque with vulnerability index based on

- 463 convolutional neural networks. *Comput Med Imaging Graph* 2020;81:101711.
- 464 **20.** Eslami P, Hartman EMJ, Albaghadai M. Validation of Wall Shear Stress Assessment in  
465 Non-invasive Coronary CTA versus Invasive Imaging: A Patient-Specific Computational  
466 Study. *Ann Biomed Eng* 2021;49:1151-1168.
- 467 **21.** Song JW, Pavlou A, Xiao J. Vessel Wall Magnetic Resonance Imaging Biomarkers of  
468 Symptomatic Intracranial Atherosclerosis: A Meta-Analysis. *Stroke* 2021;52:193-202.
- 469 **22.** Shi Z, Li J, Zhao M. Quantitative Histogram Analysis on Intracranial Atherosclerotic  
470 Plaques: A High-Resolution Magnetic Resonance Imaging Study. *Stroke* 2020;51:2161-2169.
- 471 **23.** Michel JB, Lagrange J, Regnault V. Conductance Artery Wall Layers and Their  
472 Respective Roles in the Clearance Functions. *Arterioscler Thromb Vasc Biol*  
473 2022;42:e253-e272.
- 474 **24.** Burtea C, Ballet S, Laurent S. Development of a Magnetic Resonance Imaging Protocol  
475 for the Characterization of Atherosclerotic Plaque by Using Vascular Cell Adhesion  
476 Molecule-1 and Apoptosis-Targeted Ultrasmall Superparamagnetic Iron Oxide Derivatives.  
477 *Arteriosclerosis Thrombosis and Vascular Biology* 2012;32:E36-+.
- 478 **25.** Trivedi RA, Mallawarachi C, JM UK-I. Identifying inflamed carotid plaques using in  
479 vivo USPIO-enhanced MR imaging to label plaque macrophages. *Arterioscler Thromb Vasc*  
480 *Biol* 2006;26:1601-1606.
- 481 **26.** Howarth SPS, Tang TY, Trivedi R. Utility of USPIO-enhanced MR imaging to identify  
482 inflammation and the fibrous cap: A comparison of symptomatic and asymptomatic  
483 individuals. *Eur J Radiol* 2009;70:555-560.
- 484 **27.** Durham AL, Speer MY, Scatena M. Role of smooth muscle cells in vascular calcification:  
485 implications in atherosclerosis and arterial stiffness. *Cardiovasc Res* 2018;114:590-600.
- 486 **28.** Beldman TJ, Senders ML, Alaarg A. Hyaluronan Nanoparticles Selectively Target  
487 Plaque-Associated Macrophages and Improve Plaque Stability in Atherosclerosis. *Acs Nano*  
488 2017;11:5785-5799.
- 489 **29.** Karel M, Hechler B, Kuijpers M. Atherosclerotic plaque injury-mediated murine  
490 thrombosis models: advantages and limitations. *Platelets* 2020;31:439-446.
- 491 **30.** Zhou Y, Zhang NR, Zheng ZN. Regular transient limb ischemia prevents atherosclerosis  
492 progression in hypercholesterolemic rabbits. *Chin Med J (Engl)* 2019;132:1079-1086.

493

494

495

496

497

498

499 **FIGURES AND LEGENTS**

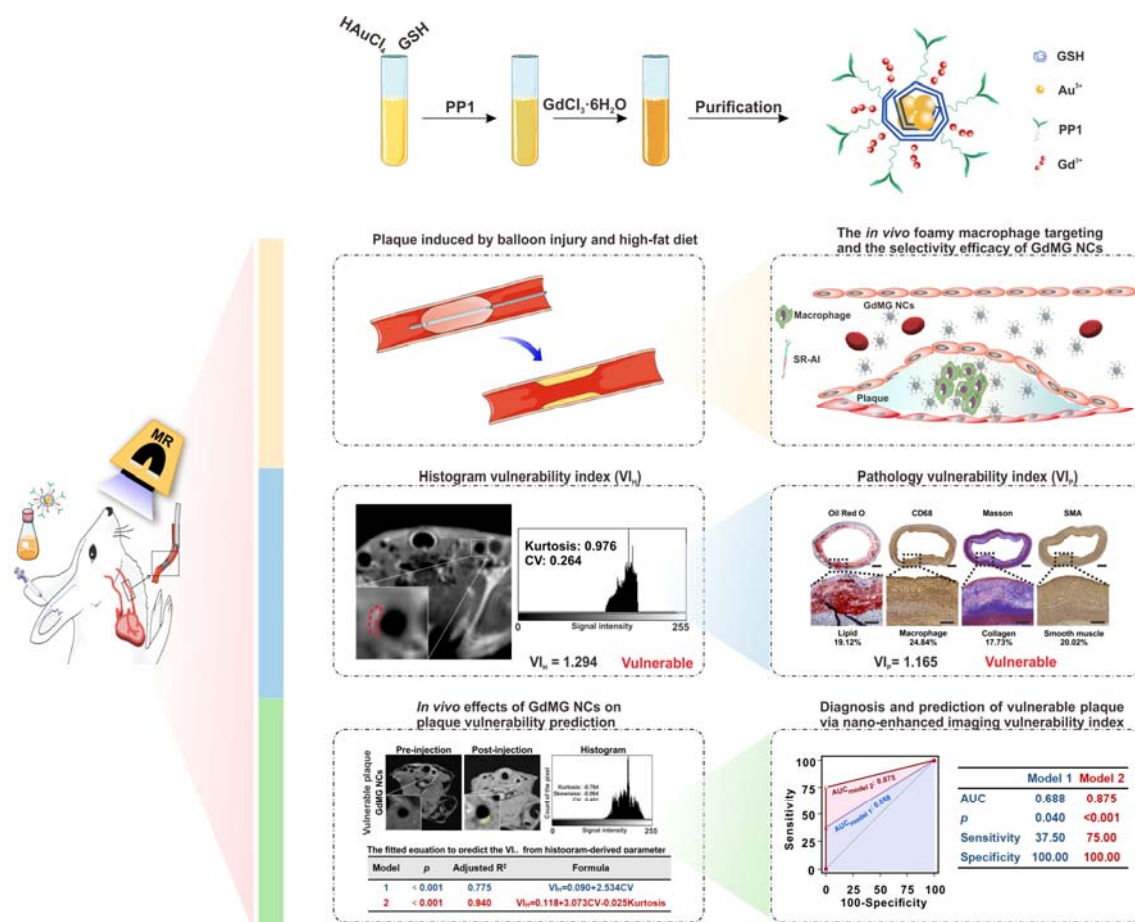

500

501 Schematic outlining the synthesis of PP1-Au@GSH@Gd NCs (GdMG NCs) and the strategy

502 for plaque vulnerability prediction.

503

504

505

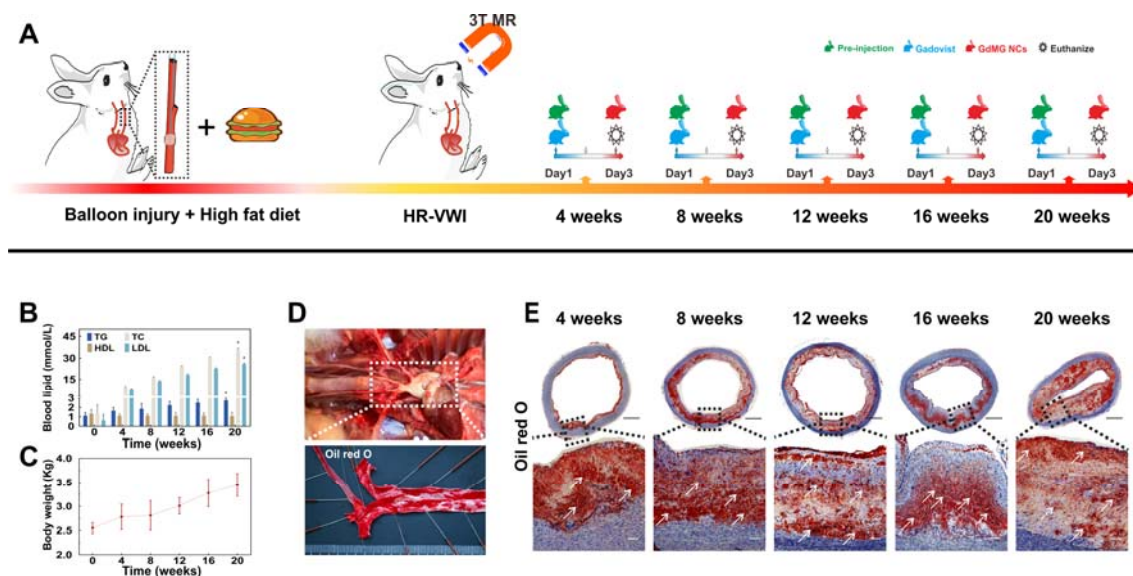

506

507 **Figure 1** Construction of Atherosclerotic Rabbit Model. The experimental timeline (A)

508 includes a one-week regular diet, a one-week atherogenic diet before the injury, balloon

509 injury, and atherogenic feeding before euthanasia. The blood lipid disorder (B) (TC: total

510 cholesterol; TG: triglycerides; HDL-C: high-density lipoprotein-cholesterol; LDL-C:

511 low-density lipoprotein) were induced by high-fat diet (HFD) and the body weight (C) keep

512 increasing during the experiment session. Gross lesions of the aorta and carotid artery, and

513 stained by Oil red O (visualized as a red area on face) (D) shows the atherosclerosis change.

514 Serial paraffin cross-sections of the carotid artery were stained with Oil red O (E) revealing

515 the growth of plaque lipid content over time.

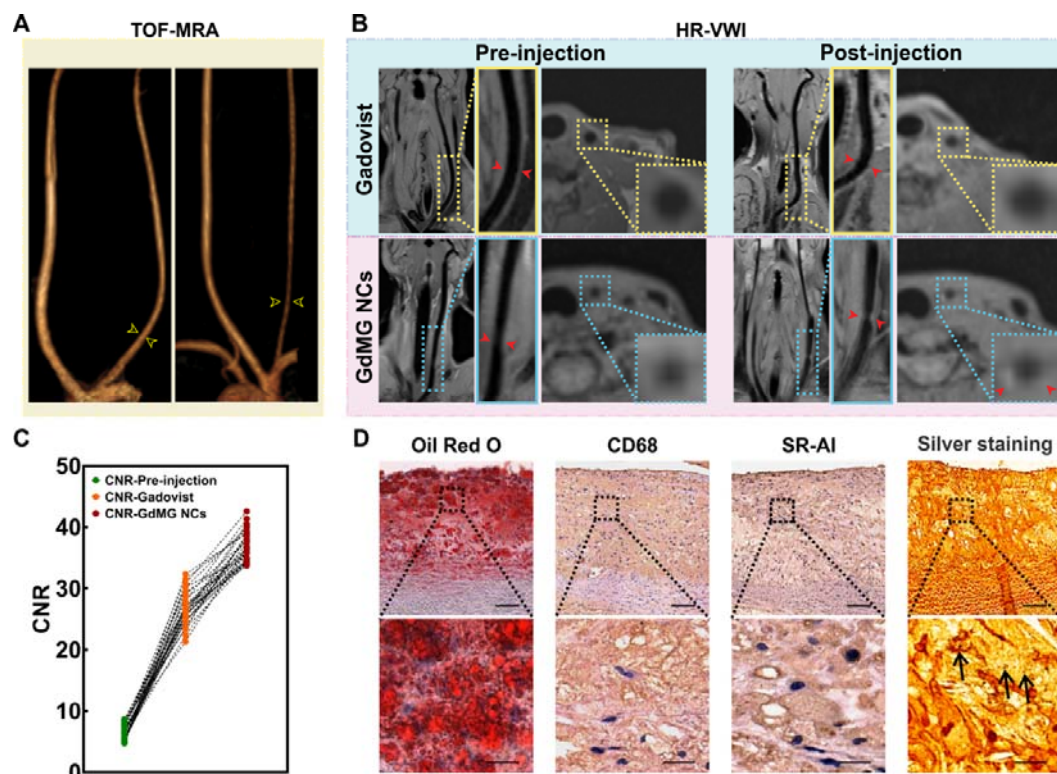

516

517 **Figure 2** In vivo target ability of GdMG NCs in atherosclerotic rabbits. The vessel wall  
518 images of atherosclerotic rabbit carotid artery before and after the injection of contrast agent  
519 (highlighted within a yellow box). (A) The traditional TOF-MRA clarifies the vessel diameter  
520 to measure the severity of atherosclerosis (yellow arrowhead). (B) Contrast-enhanced  
521 HR-VWI, from which GdMG NCs were able to identify a higher eccentric plaque signal on  
522 the axis section image (red arrowhead), while Gadovist only showed the vessel wall  
523 thickening with circumferential enhancement (yellow dotted box). The contrast to noise ratio  
524 (CNR) (C) GdMG NCs was significantly higher than that of Gadovist ( $p < 0.05$ ). The  
525 histology assessment of the stenotic lesions was conducted for the validation of the GdMG  
526 NCs targeting capability to macrophages in plaque (D). Abundant lipid deposits were shown  
527 by Oil red O staining, confirming that the enhanced areas were definite plaque sites;  
528 over-expression of CD68 and SR-AI were detected by IHC staining, indicating the foamy

529 macrophages tremendously enriched in plaque area (black arrow); the extensive presence of  
530 GdMG NCs deposition in plaque was validated by silver-staining (black arrow), which  
531 further providing strong shreds of evidence to the compelling targeting capacity of GdMG  
532 NCs to atherosclerotic plaques.

533

534

535

536

537

538

539

540

541

542

543

544

545

546

547

548

549



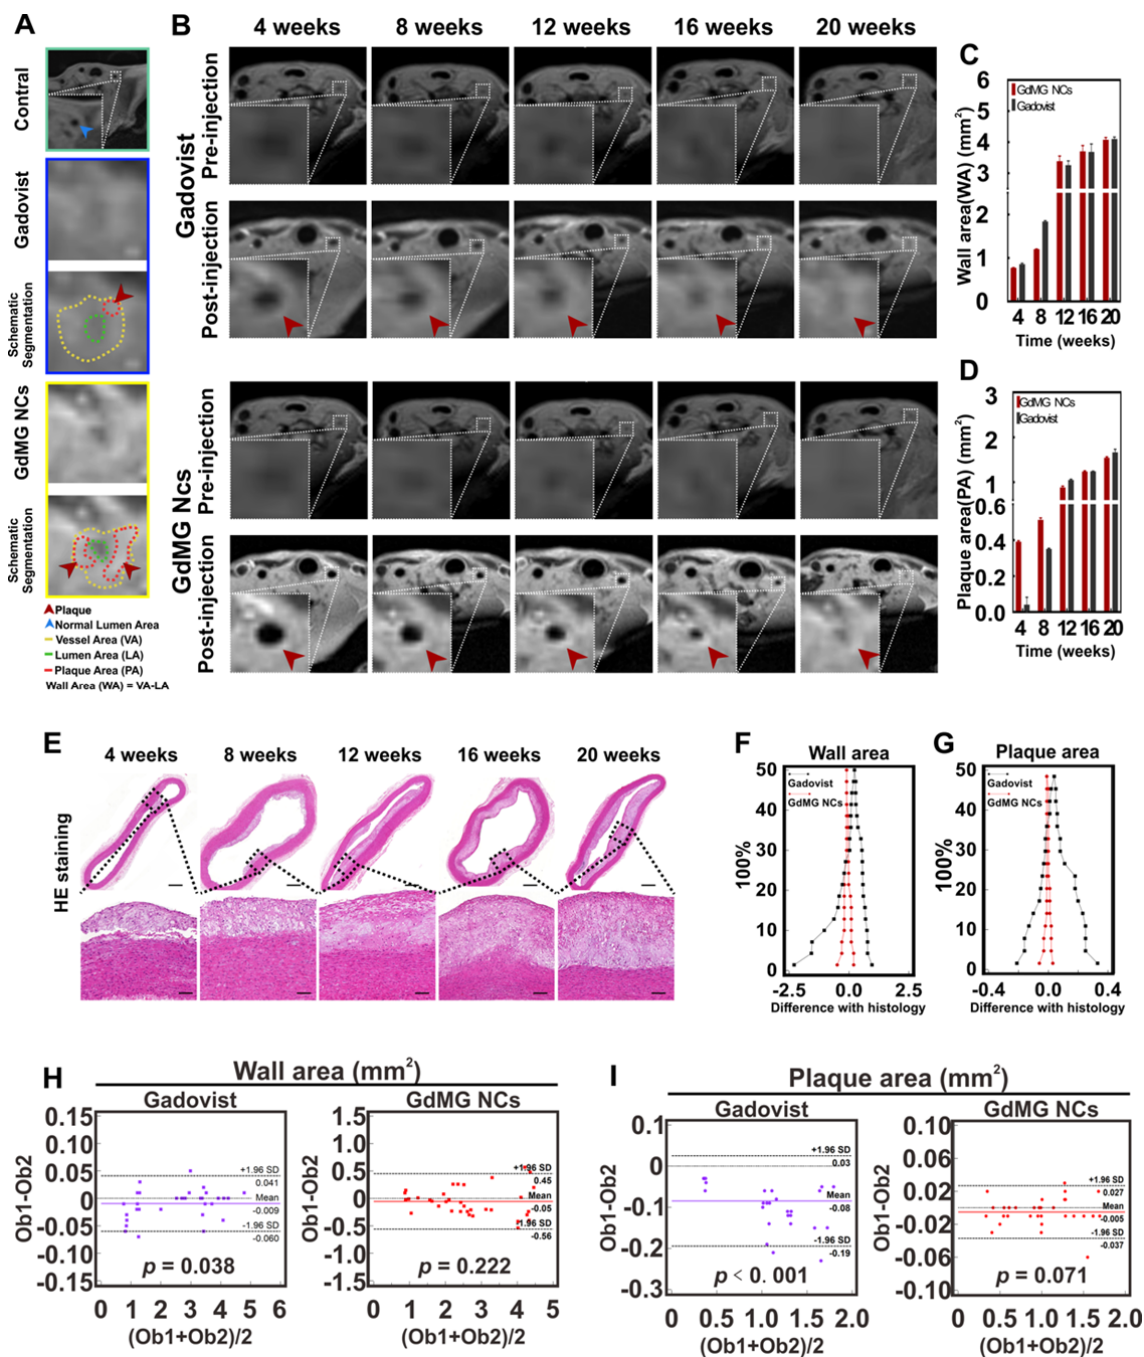

550

551 **Figure 3** Dynamic changes of wall area (WA) and plaque area (PA) of atherosclerotic rabbit's  
 552 carotid artery by contrast-enhanced HR-VWI with GdMG NCs. (A) Schematic segmentation  
 553 of HR-VWI. The control case showed a cross-section image of normal rabbit LCCA with  
 554 smooth, round and non-stenotic lumen inner-surface. As can be ascertained, the  
 555 crescent-shaped hyperintense signal (representing PA, red line) enhanced by the presence of

556 GdMG NCs was significantly higher than Gadovist, rendering the clearer plaque delineation.

557 Besides, the eccentric iso- and slightly hyperintense signal representing WA (area between

558 yellow and green circle) could also be easily delineated by the incorporated GdMG NCs with

559 sharp demarcation. While after the Gadovist administration, WA presented a heterogeneous

560 annular enhancement region with blurred boundaries, in which the existence of a relatively

561 ambiguous contrast-enhanced spot (recorded as PA) could be barely outlined manually. (B)

562 The cross-section images represent a crescent-shaped hyperintense signal (representing PA)

563 enhanced by GdMG NCs was significantly higher than Gadovist (red arrowhead). The

564 dynamic progression of plaque WA (C) and PA (D) was illustrated according to the

565 contrast-enhanced HR-VWI with Gadovist and GdMG NCs. H&E-staining sections (E)

566 determine the true histological PA and WA at different plaque stages. The percentile for the

567 rated difference between contrast-enhanced HR-VWI to pathology is shown in mountain

568 plots (F, G). The GdMG NCs curve (red dot-dash-line) is steeply centered around zero,

569 indicating a small divergence from histology than Gadovist (black dot-dash-line).

570 Bland-Altman plot (H) shows the comparison of the inter-observer agreement for

571 contrast-enhanced HR-VWI evaluation. GdMG NCs could offer a more satisfying diagnostic

572 agreement than Gadovist, since GdMG NCs have less inter-observer difference (red dots,  $p >$

573  $0.05$ ) than Gadovist (purple dots,  $p < 0.05$ ).  $*p < 0.05$ ,  $n = 6$  biologically independent animals

574 in different plaque stages.  $*p < 0.05$ , Bonferroni adjustment for multiple comparisons,  $n = 6$

575 biologically independent animals in each time point. The data are presented as mean  $\pm$  SEM.

576 RM ANOVA with Bonferroni's post hoc test.

### A. Model construction and test

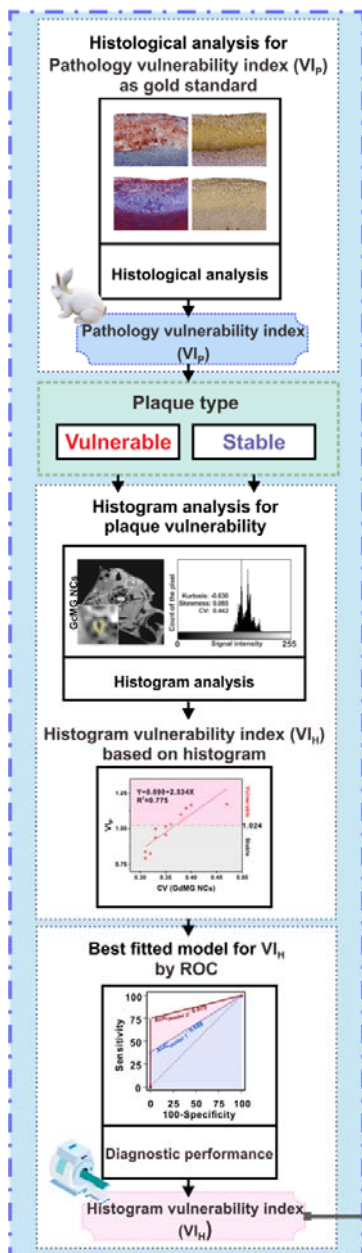

### B. Application and validation

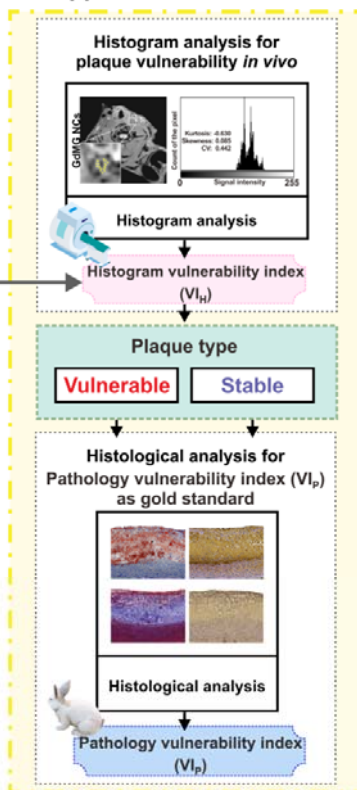

### C. The novel method for plaque vulnerability

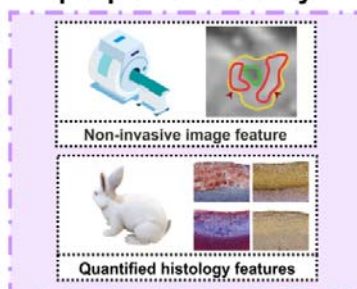

577

578 **Figure 4** Flowchart of the *in vivo*, non-invasive and quantitative characterization of plaque

579 vulnerability and the final performance evaluation in the work.

580

581

582

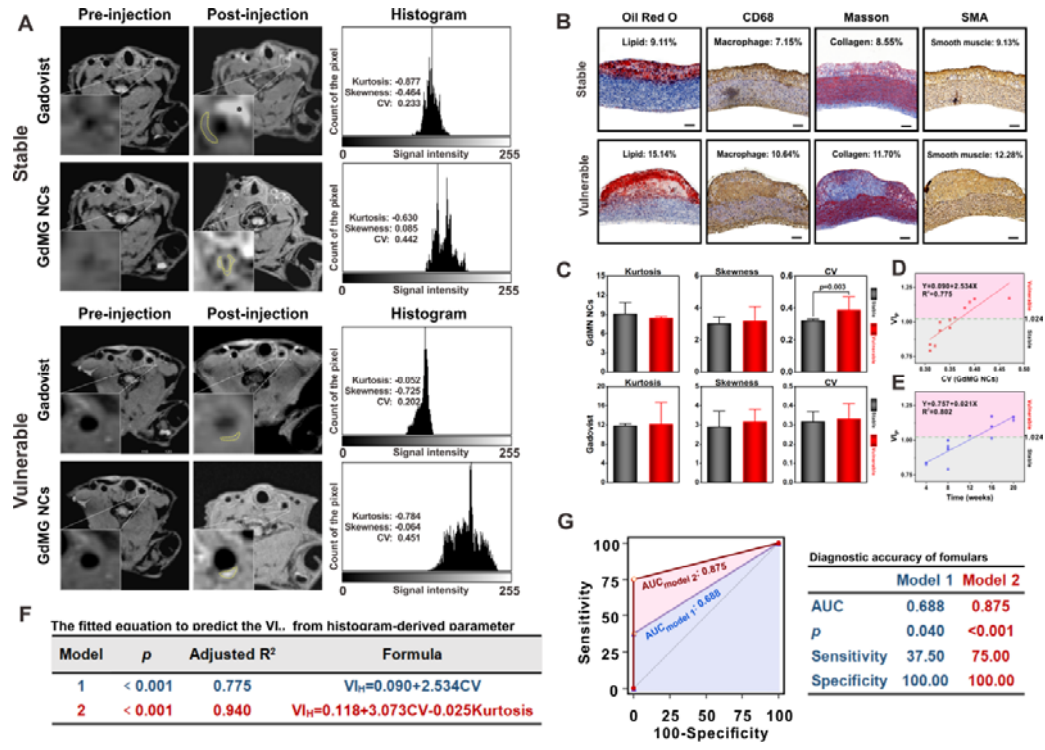

583

584 **Figure 5** Non-invasive Plaque vulnerability prediction by GdMG NCs enhanced HR-VWI  
 585 images and histogram analysis. The histogram analysis (A) of plaque (yellow dot-line)  
 586 according to contrast-enhanced HR-VWI with Gadovist and GdMG NCs. The signal  
 587 distribution features are described by skewness (asymmetrical shape), and kurtosis  
 588 (sharpness), and CV describes the dispersion of signal intensity. The serial co-registered  
 589 histology tests (B) are quantified and analyzed to calculate the pathology vulnerability index  
 590 ( $VI_P$ ) for distinguishing vulnerable plaques ( $VI_P \geq 1.024$ ) from stable plaques ( $VI_P < 1.024$ ).  
 591 Box plots (C) showed the difference in the histogram parameters and signal intensity features  
 592 between stable (n = 17) and vulnerable plaque (n = 13), evaluated on contrast-enhanced  
 593 HR-VWI ( $p < 0.05$ ). 3D The scatter plots (D) describe the relationship among kurtosis,  
 594 skewness and CV, with the color mapping representing the  $VI_P$  value and the scatter diameter  
 595 representing the plaque area. The fitting formula based on the multiple linear regression

596 model (E) offers a theory for calculating the  $VI_P$  from the contrast-enhanced HR-VWI *in vivo*.

597 The fitting formula from the GdMG NCs (model 2) committed a better diagnosis prediction

598 for vulnerable plaque. Besides, CV showed a significant correlation to  $VI_P$  ( $p < 0.05$ ).

599

600

601

602

603

604

605

606

607

608

609

610

611

612

613

614

615

616

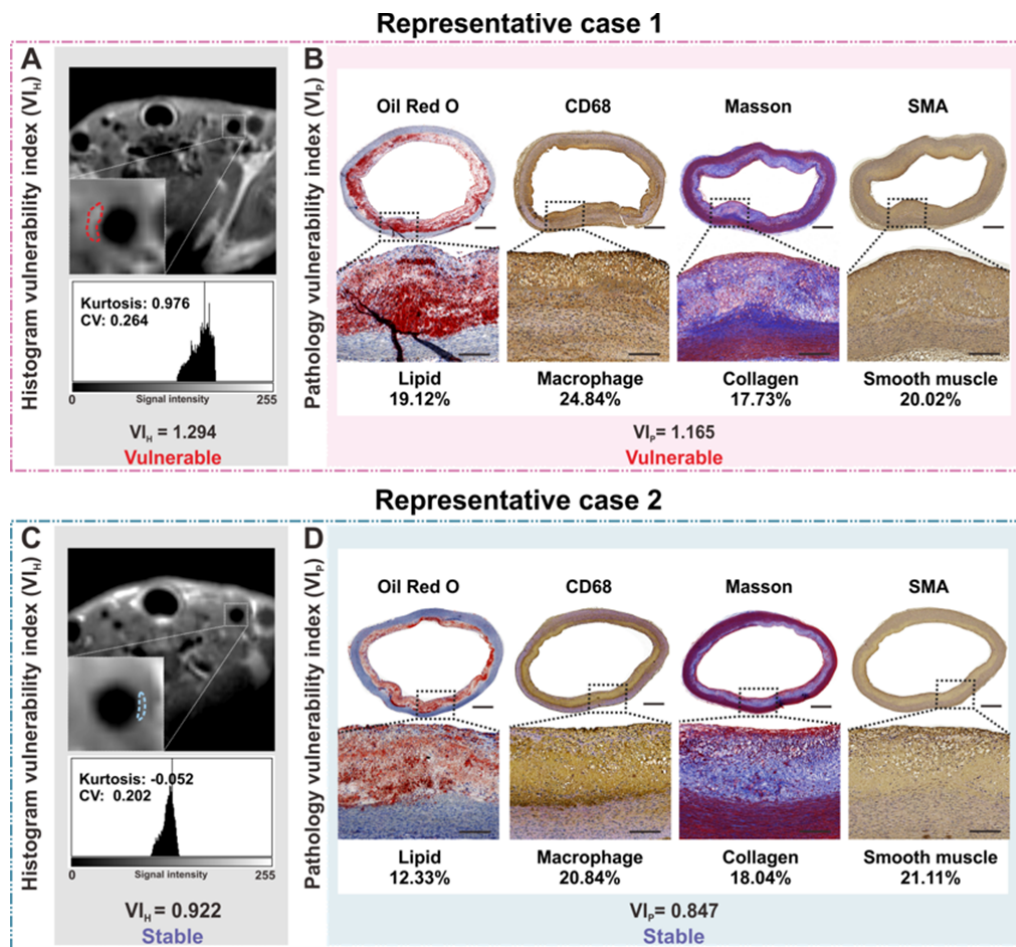

617

618 **Figure 6** The validation of the diagnostic value of the GdMG NCs enhanced HR-VWI. (A)

619 Histogram vulnerability index ( $VI_H$ ) was calculated based on contrast-enhanced HR-VWI

620 with Gadovist and GdMG NCs. (B) Pathology vulnerability index ( $VI_P$ ) calculated as the

621 gold criteria for plaque vulnerability. (C) Receiver operating characteristic curve for

622 evaluating our prediction models. The area under curve (AUC) represents the proposed fitting

623 formula, especially model 2 has a perfect diagnostic performance.

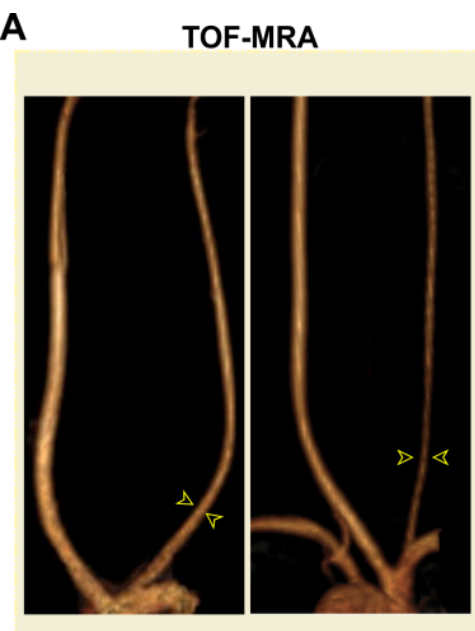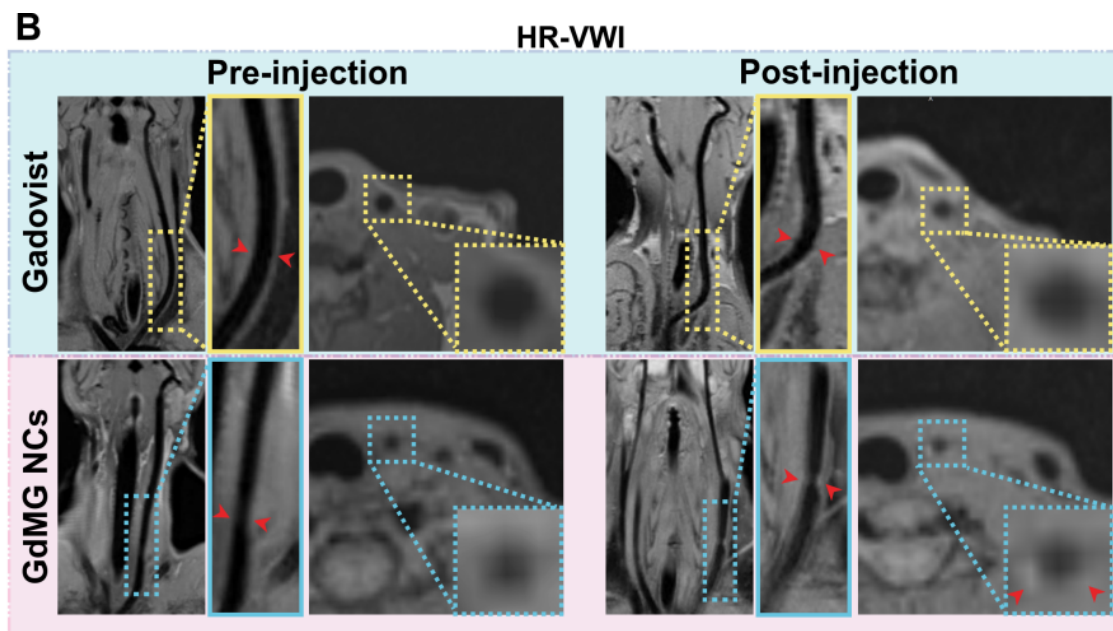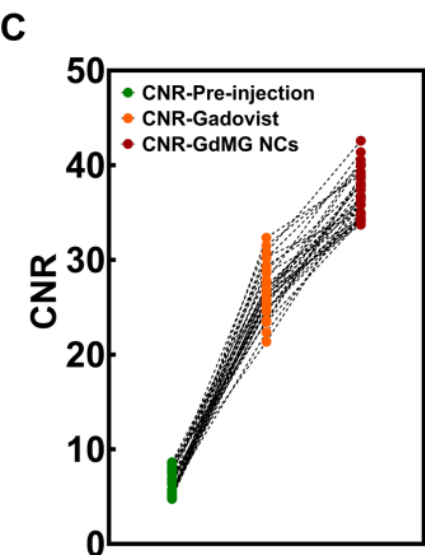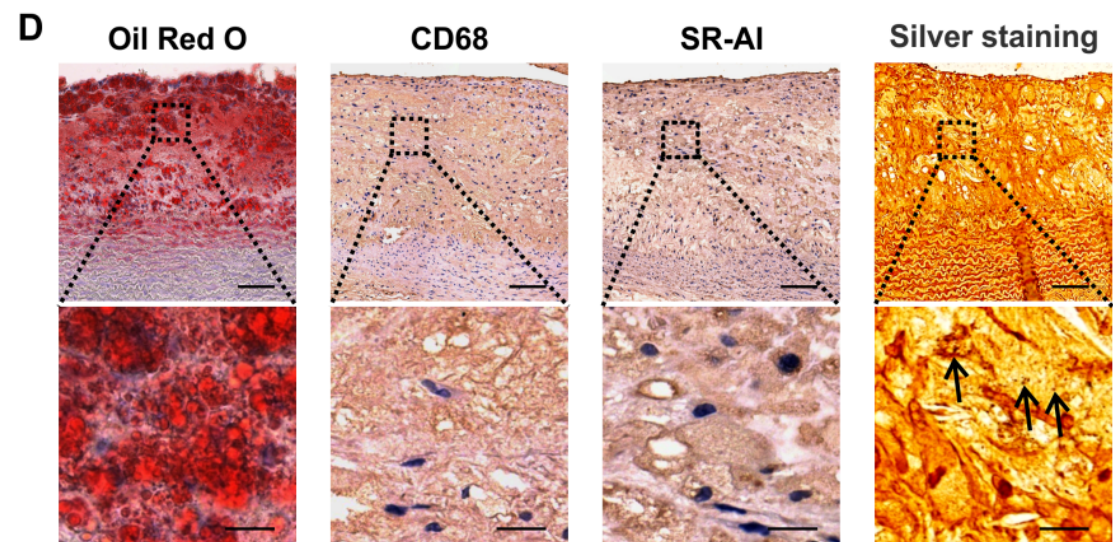

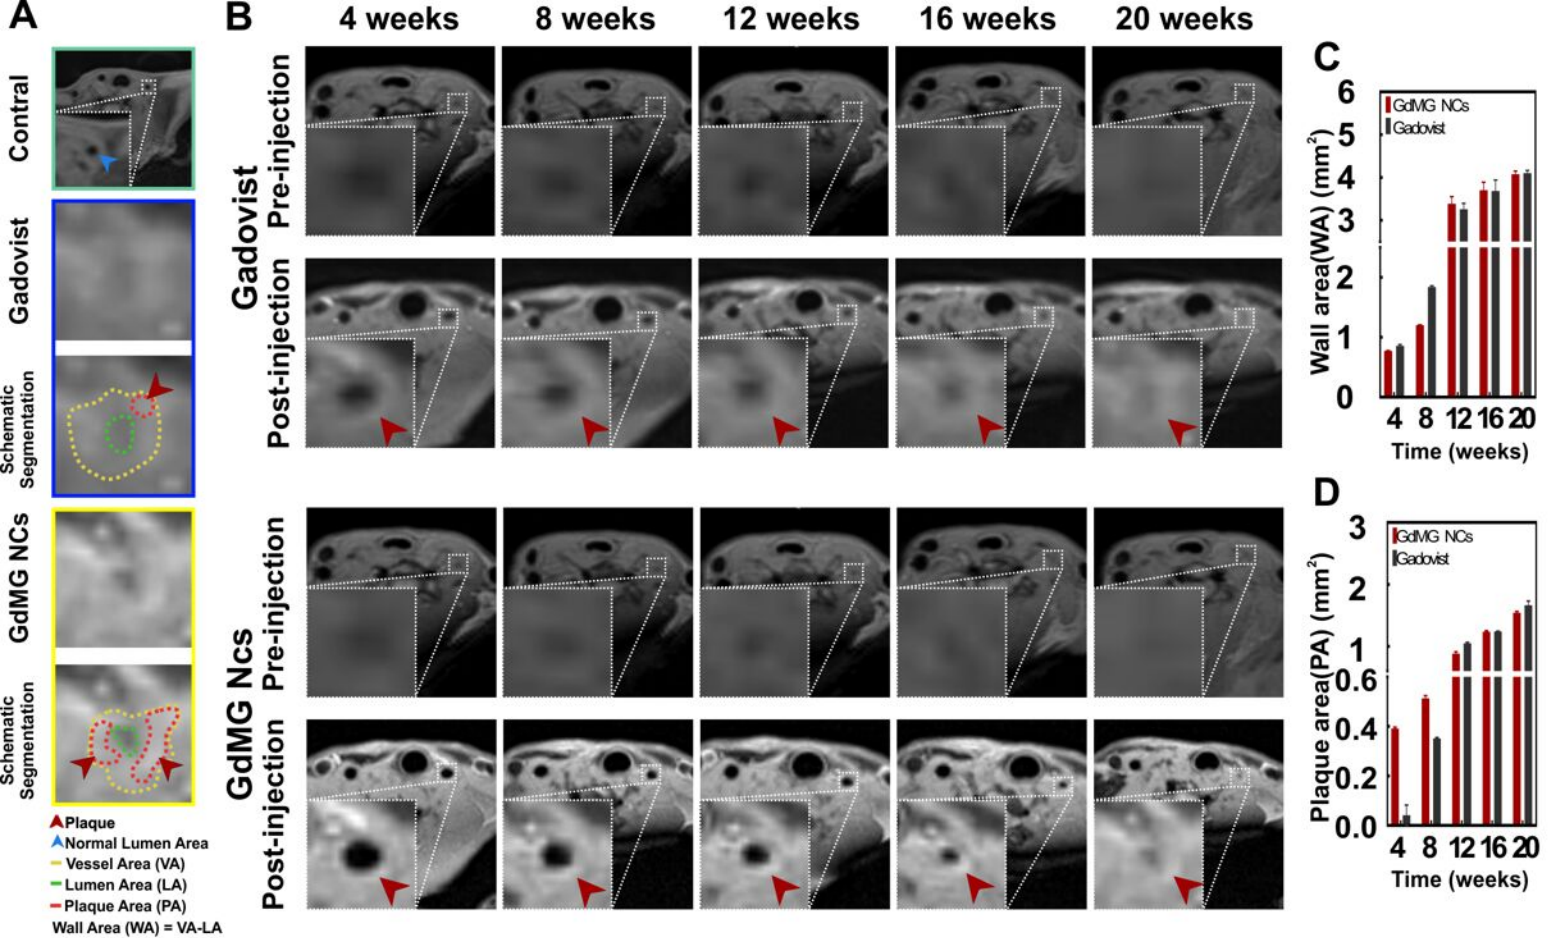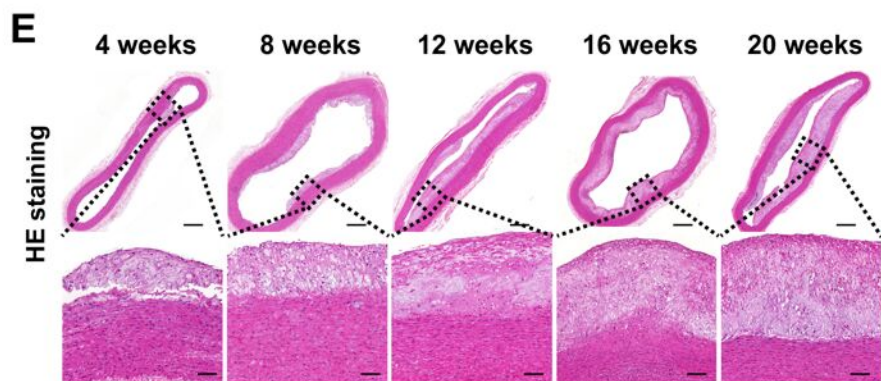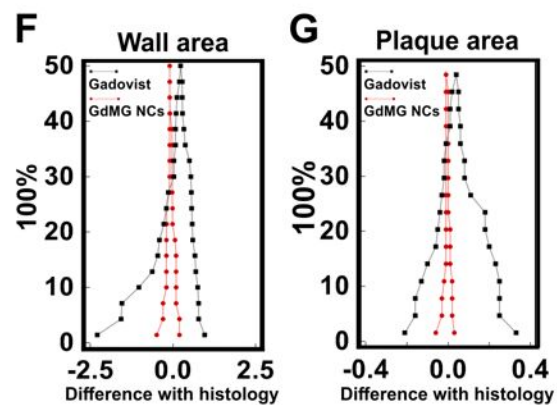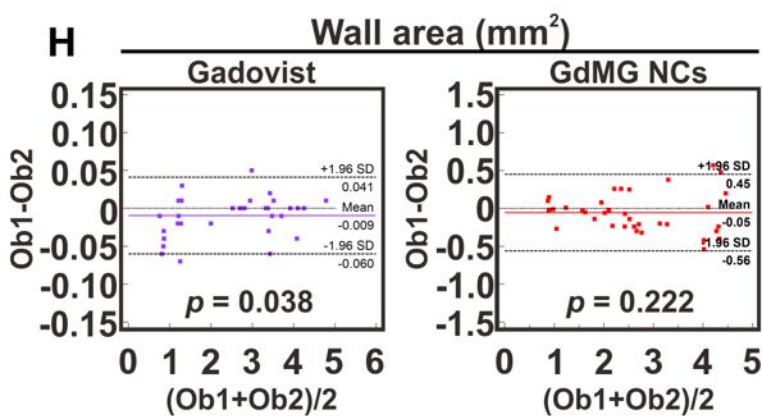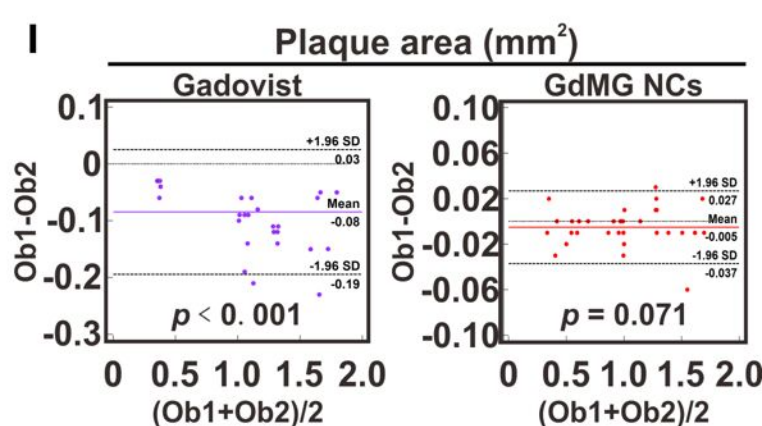



## A. Model construction and test

Histological analysis for Pathology vulnerability index ( $VI_P$ ) as gold standard

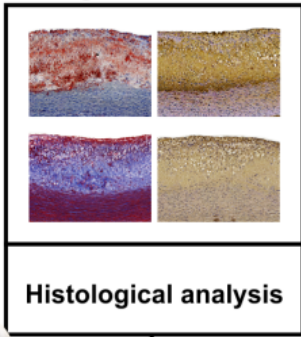

Histological analysis

Pathology vulnerability index ( $VI_P$ )

Plaque type

Vulnerable

Stable

Histogram analysis for plaque vulnerability

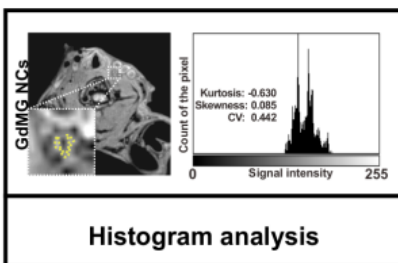

Histogram analysis

Histogram vulnerability index ( $VI_H$ ) based on histogram

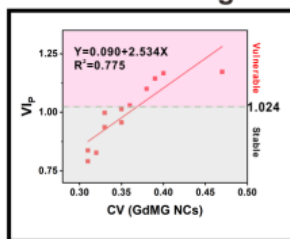

Best fitted model for  $VI_H$  by ROC

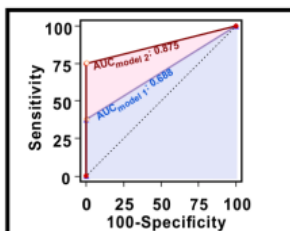

Diagnostic performance

Histogram vulnerability index ( $VI_H$ )

## B. Application and validation

Histogram analysis for plaque vulnerability *in vivo*

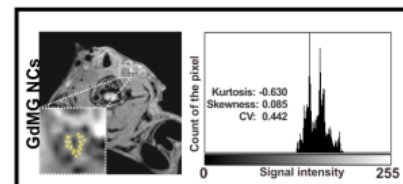

Histogram analysis

Histogram vulnerability index ( $VI_H$ )

Plaque type

Vulnerable

Stable

Histological analysis for Pathology vulnerability index ( $VI_P$ ) as gold standard

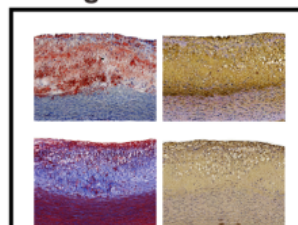

Histological analysis

Pathology vulnerability index ( $VI_P$ )

## C. The novel method for plaque vulnerability

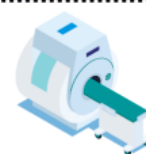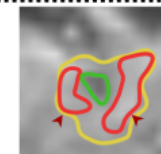

Non-invasive image feature

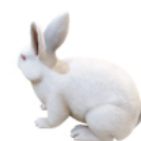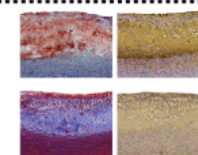

Quantified histology features

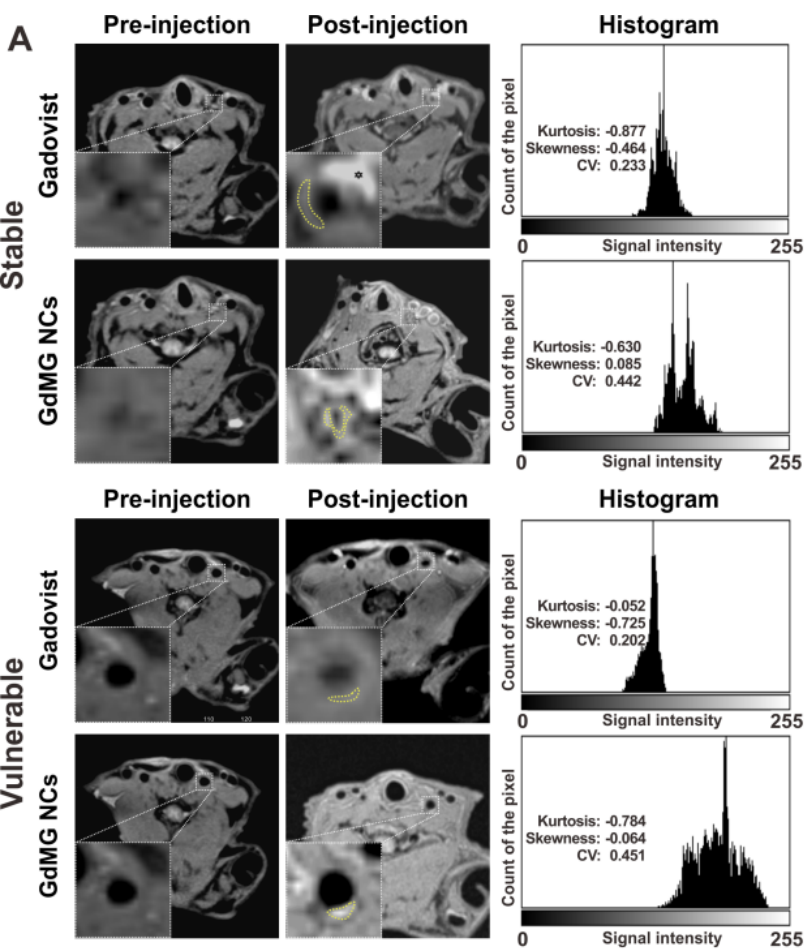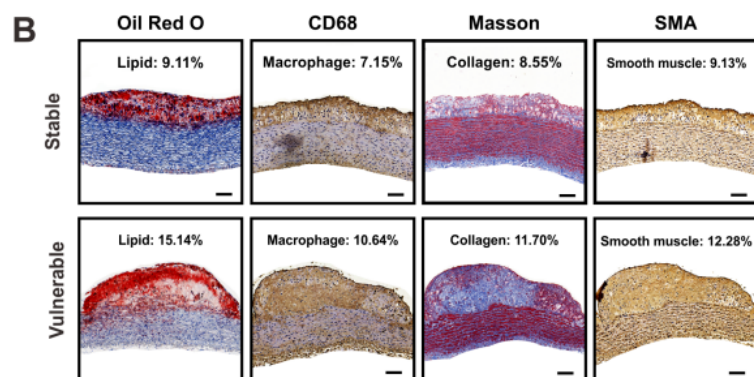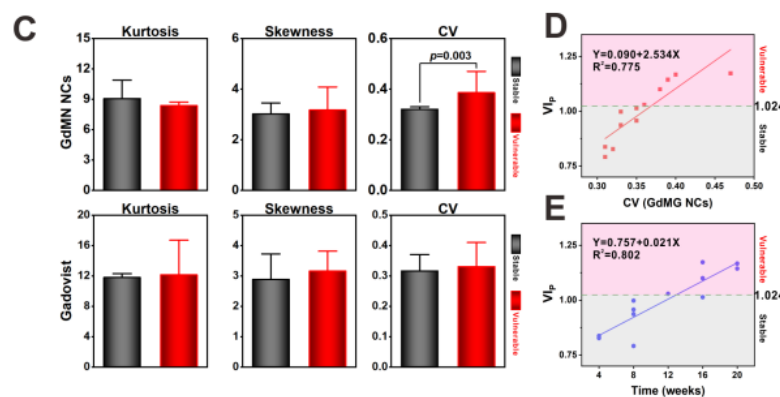

**F**

The fitted equation to predict the  $VI_H$  from histogram-derived parameter

| Model | $p$     | Adjusted $R^2$ | Formula                                  |
|-------|---------|----------------|------------------------------------------|
| 1     | < 0.001 | 0.775          | $VI_H = 0.090 + 2.534CV$                 |
| 2     | < 0.001 | 0.940          | $VI_H = 0.118 + 3.073CV - 0.025Kurtosis$ |

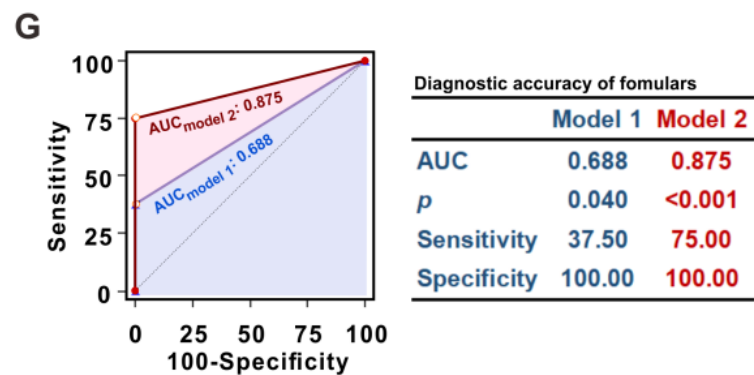

## Representative case 1

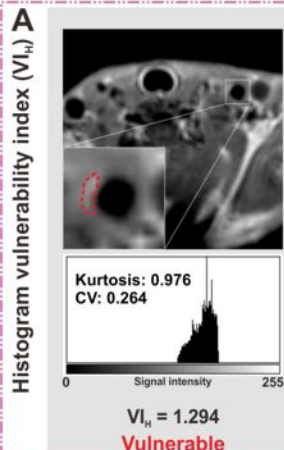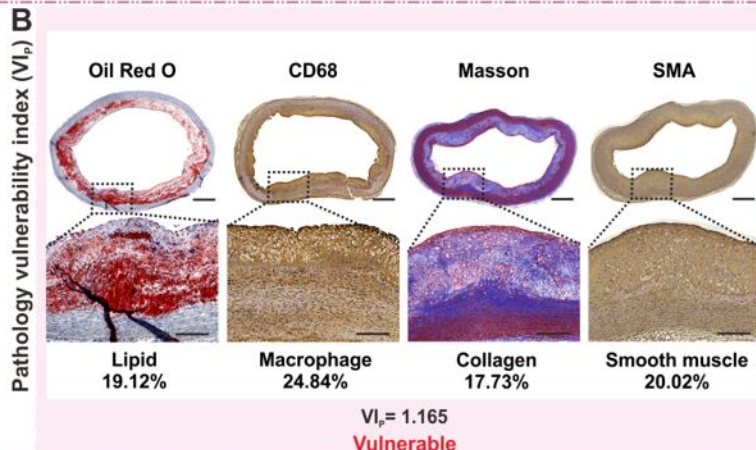

## Representative case 2

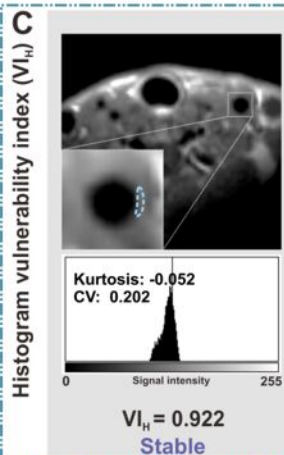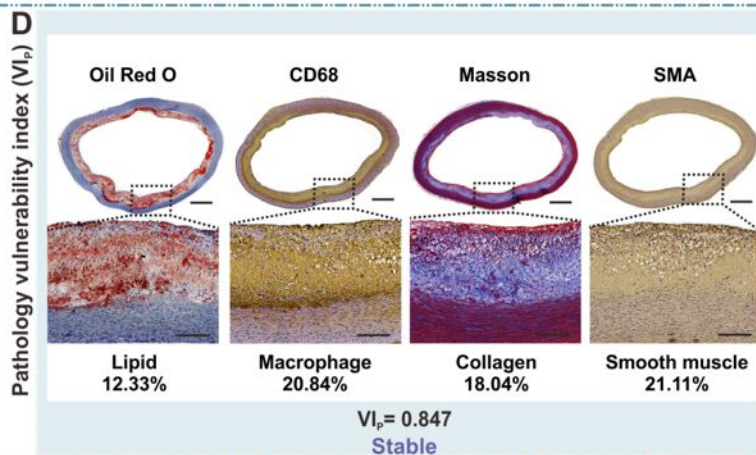

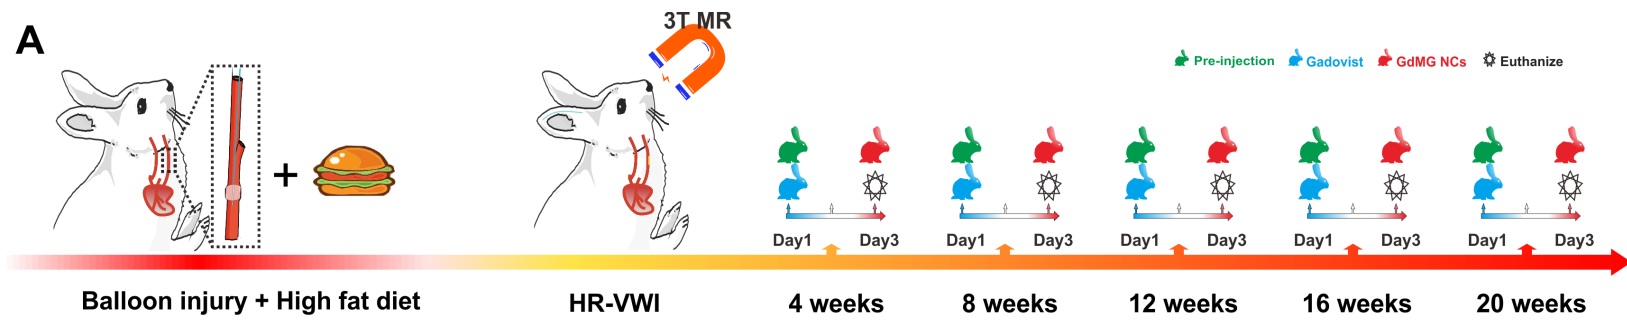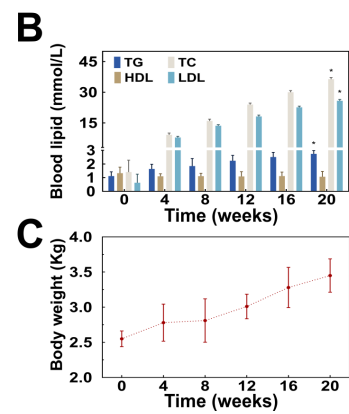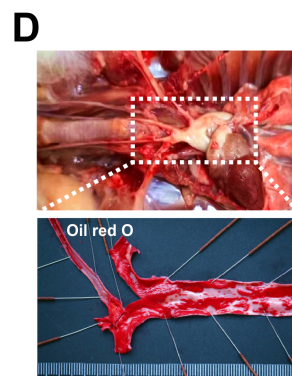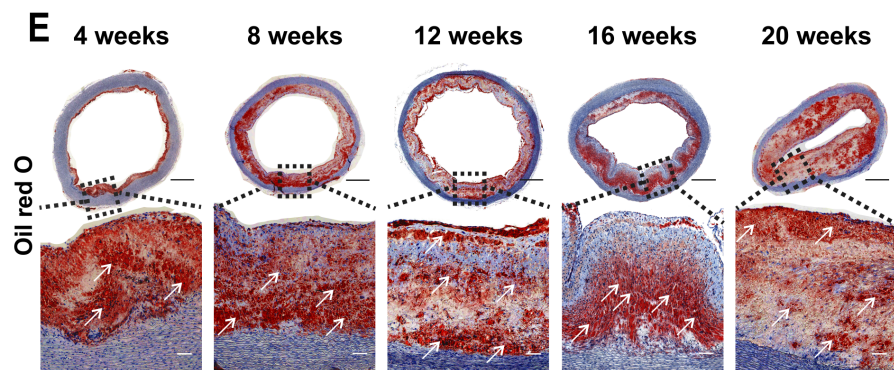

Source: https://medrxiv.org/content/10.1101/2023.03.09.23287077v1.full.pdf
